# Supplementary material for: Costs of Gasification Technologies for Energy and Fuel Production: Overview, Analysis, and Numerical Estimation
Source: MDPI journal article supplement (doi:10.3390/recycling8030049), 2023-05-19
Supplement: s1 [file s1]

# Supplementary material - Tables with estimates for CapEx and OpEx of gasification technologies

Determining the best approach for biomass gasification can be challenging due to the many factors that must be considered, including cost, performance, syngas composition, and final application. The following is a series of tables highlighting the trade-offs between different options, allowing users to identify the most suitable combinations for their needs and circumstances. While these tables can provide estimates for CapEx and OpEx for a hypothetical gasification plant, it is important to note that actual costs will depend on a wide range of factors, including the specific design and location of the system, the type and quality of feedstock used, and prevailing economic conditions.

**Table S1.** Estimates for CapEx and OpEx according to gasifier type.

| Gasifier type             | CapEx                  | OpEx                   | Reference  |
|---------------------------|------------------------|------------------------|------------|
| Fixed-bed                 | 1000€ - 4000€ per kW   | 0.01€ - 0.16€ per kWh  | [40,77,78] |
| Fluidized-bed             | 2500€- 5000€ per kW    | 0.09€- 0.15€ per kWh   | [79]       |
| Entrained-flow            | 2000€ - 6500€ per kW   | 0.02€ - 0.05€ per kWh  | [80]       |
| Plasma                    | 5000€ - 10,000€ per kW | 0.05€ - 0.20€ per kWh  | [3,81,82]  |
| Circulating fluidized bed | 1500€- 6500€ per kW    | 0.08€- 0.12€ per kWh   | [83]       |
| Dual fluidized bed        | 2500€- 8000€ per kW    | €0.05€ - 0.08€ per kWh | [84,85]    |

**Table S2.** Estimates for CapEx and OpEx according to oxidizing agents.

| Oxidizing agent | CapEx                 | OpEx                   | Reference  |
|-----------------|-----------------------|------------------------|------------|
| Air             | 800€ – 4500€ per kW   | 0.05€ - €0.12€ per kWh | [14,77]    |
| Steam           | 1500€ - €4500€ per kW | 0.07€ - €0.13€ per kWh | [23,77]    |
| O <sub>2</sub>  | 2500€ - €6500€ per kW | 0.10€ - €0.17€ per kWh | [11,77,86] |
| CO <sub>2</sub> | 2500€ - €6000€ per kW | 0.09€ - €0.15€ per kWh | [17,77]    |

**Table S3.** Estimates for CapEx and OpEx according to syngas cleaning and tar cracking technologies.

| Technology             | CapEx                  | OpEx                              | Reference       |
|------------------------|------------------------|-----------------------------------|-----------------|
| <i>Syngas cleaning</i> |                        |                                   |                 |
| Cyclones               | 1.64 €- 3.78€ per kW   | n/a                               | [87]            |
| Filters                | 10.04€ - 30.80€ per kW | n/a                               | [87]            |
| Scrubbers              | 50€ - 500€ per kW      | 0.03€ - 0.05€ per kWh             | [88-91]         |
| Adsorbents             | 200€ - 800€ per kW     | 0.02€ - 0.03€ per kWh             | [92]            |
| <i>Tar cracking</i>    |                        |                                   |                 |
| Catalytic              | n/a                    | 0.05€ - 0.10€ per Nm <sup>3</sup> | [93-95]         |
| Thermal and plasma     | n/a                    | 0.02€ - 0.10€ per Nm <sup>3</sup> | [3,29,82,96-98] |

**Table S4.** Estimates for CapEx and OpEx according to syngas application.

| Application                                    | CapEx                  | OpEx                    | Reference         |
|------------------------------------------------|------------------------|-------------------------|-------------------|
| <i>Energy</i>                                  |                        |                         |                   |
| Combustion chamber and boiler                  | 1,00€ - 2500€ per kW   | 0.03€ - 0.05€ per kWh   | [99-103]          |
| Combustion steam turbine and generator         | 500€ - 1500€ per kW    | 0.05€ - 0.08€ per kWh   | [101,104,105]     |
| Combustion in an ICE engine                    | 500€ - 1500€ per kW    |                         | [105-110]         |
| Combustion gas turbine                         | 500€- 6000€ per kW     | 0.05€ - 0.10€ per kWh   | [111-116]         |
| CHP heat recovery equipment                    | 100€ - 500€ per kW     |                         | [109,116-118]     |
| Fuel cell                                      | 2000€ – 12,000€ per kW | 0.10€ - 0.50€ per kWh   | [116,117,119-122] |
| Biomass-integrated gasification combined cycle | 1300€ – 10,000€ per kW | 0.05€ - 0.15€ per kWh   | [121,123-125]     |
| <i>Gasification to chemicals</i>               |                        |                         |                   |
| Hydrogen                                       | 3000€ - 7500€ per kW   | 0.02€ - 0.14€ per kWh   | [126-129]         |
| Methane                                        | 800€ - 1200€ per kWh   | 0.03€ - 0.06€ per kWh   | [33,34,130-133]   |
| Methanol                                       | 600€ - 1000€ per kWh   | 0.02€ - 0.04€ per kWh   | [30,65,134-137]   |
| Mixed alcohols                                 | 1200€ - 1600€ per kW   | 0.05€ - 0.10€ per kWh   | [138-142]         |
| Ethanol                                        | 1000€ - 1500€ per kW   | 0.035€ - 0.065€ per kWh | [143-147]         |
| Sustainable aviation fuels                     | 3000€ - 10,000€ per kW | 0.65€ – 1.00€ per kWh   | [148-150]         |
